# Supplementary material for: Reduction in risk of death among patients admitted with COVID-19 between first and second epidemic waves in New York City
Source: PubMed Central journal article supplement — medRxiv. 2022 Mar 30:2022.03.29.22273044. Preprint. [Version 1] doi: 10.1101/2022.03.29.22273044 (PMC8978950; doi:10.1101/2022.03.29.22273044), 2022-03-30
Supplement: NIHPP2022.03.29.22273044V1-supplement-1.pdf [file NIHPP2022.03.29.22273044V1-supplement-1.pdf]

488 **Supplemental material**

489 Table S1: ICD-10 codes used to query patient charts to determine pre-existing conditions for  
490 each of the listed diagnoses. Electronic medical record also queried for listed text strings to  
491 determine pre-existing conditions.

---

|      |                 |                                                                                                       |
|------|-----------------|-------------------------------------------------------------------------------------------------------|
| HTN* | ICD-10 codes:   | I10, I11, I12, I13, I15, I16, O10.1, O10.2, O10.3, O10.4, O10.9                                       |
|      | String matches: | "htn", "hyperten"                                                                                     |
| DM*  | ICD-10 codes:   | E08, E09, E10, E11, E13, O24.4                                                                        |
|      | String matches: | "dm", "diabetes"                                                                                      |
| CAD* | ICD-10 codes:   | I21, I22, I23, I24, I25, Z98.61, Z95.1                                                                |
|      | String matches: | "cad", "coronary"                                                                                     |
| CKD* | ICD-10 codes:   | N03, N07, N08, N11, N14, N18, N19, N29, I12, I13, Z99.2, E10.22, E11.22, E13.22, E08.22, O10.3, D63.1 |
|      | String matches: | "ckd", "chronic kidney"                                                                               |

---

492 \*Abbreviations: Hypertension (HTN), diabetes mellitus (DM), coronary artery disease (CAD),  
493 chronic kidney disease (CKD)

494 Table S2: Unadjusted and adjusted Cox proportional hazards model of the association between  
 495 epidemic wave and death by 30 days after admission adjusted for potentially confounding  
 496 factors, among those  $\geq 75$  years old.

|                                                    | Unadjusted               | Adjusted for epi-period                                       |                                                                             |
|----------------------------------------------------|--------------------------|---------------------------------------------------------------|-----------------------------------------------------------------------------|
|                                                    | HR (95% CIs)             | HR for covariate (95% CIs)<br>adjusted for Epidemic<br>period | HR for epidemic period<br>(95% CIs) adjusted each<br>covariate individually |
| Epidemic Period                                    |                          |                                                               |                                                                             |
| First                                              | Ref                      | NA                                                            | Ref                                                                         |
| Second                                             | <b>0.43 (0.35, 0.53)</b> |                                                               | <b>0.43 (0.35, 0.53)</b>                                                    |
| Sex                                                |                          |                                                               |                                                                             |
| Female                                             | Ref                      | Ref                                                           | Ref                                                                         |
| Male                                               | 1.14 (0.95, 1.36)        | 1.11 (0.93, 1.33)                                             | <b>0.43 (0.35, 0.54)</b>                                                    |
| Race/Ethnicity                                     |                          |                                                               |                                                                             |
| Hispanic/Latino                                    | Ref                      | Ref                                                           | Ref                                                                         |
| Non-Hispanic Black                                 | 1.14 (0.84, 1.54)        | 1.10 (0.81, 1.49)                                             | <b>0.43 (0.35, 0.53)</b>                                                    |
| Non-Hispanic White                                 | 1.08 (0.83, 1.40)        | 1.08 (0.84, 1.41)                                             |                                                                             |
| Other                                              | 0.97 (0.77, 1.22)        | 0.98 (0.78, 1.23)                                             |                                                                             |
| BMI (kg/m <sup>2</sup> )                           |                          |                                                               |                                                                             |
| <30                                                | Ref                      | Ref                                                           | Ref                                                                         |
| $\geq 30$                                          | 1.23 (0.99, 1.53)        | 1.20 (0.96, 1.50)                                             | <b>0.48 (0.38, 0.59)</b>                                                    |
| Ct value, median (IQR)                             | <b>0.98 (0.97, 0.99)</b> | <b>0.98 (0.96, 0.99)</b>                                      | <b>0.35 (0.22, 0.55)</b>                                                    |
| Viral load categories                              |                          |                                                               |                                                                             |
| Low (Ct >32 or 30)                                 | Ref                      | Ref                                                           | Ref                                                                         |
| Medium (Ct 27-32 or 25-30)                         | <b>1.61 (1.22, 2.12)</b> | <b>1.62 (1.23, 2.14)</b>                                      | <b>0.35 (0.22, 0.56)</b>                                                    |
| High (Ct <27 or 25)                                | <b>1.72 (1.35, 2.20)</b> | <b>1.77 (1.39, 2.26)</b>                                      |                                                                             |
| Ever DNI                                           |                          |                                                               |                                                                             |
| Yes                                                | <b>6.81 (5.11, 9.06)</b> | <b>6.22 (4.66, 8.29)</b>                                      | Ref                                                                         |
| No                                                 | Ref                      | Ref                                                           | <b>0.54 (0.44, 0.68)</b>                                                    |
| Oxygen level at presentation                       |                          |                                                               |                                                                             |
| Room Air                                           | Ref                      | Ref                                                           | Ref                                                                         |
| Nasal Cannula                                      | <b>2.61 (1.93, 3.54)</b> | <b>2.55 (1.88, 3.46)</b>                                      | <b>0.66 (0.52, 0.82)</b>                                                    |
| Non-rebreather                                     | <b>8.65 (6.44, 11.6)</b> | <b>7.58 (5.60, 10.25)</b>                                     |                                                                             |
| Non-invasive ventilation                           | <b>4.79 (2.44, 9.39)</b> | <b>4.78 (2.44, 9.37)</b>                                      |                                                                             |
| Intubation                                         | <b>7.82 (5.18, 11.9)</b> | <b>6.97 (4.60, 10.57)</b>                                     |                                                                             |
| ICU admission by time, N (%)                       |                          |                                                               |                                                                             |
| Non-ICU                                            | Ref                      | Ref                                                           | Ref                                                                         |
| ICU at presentation                                | <b>2.54 (1.97, 3.27)</b> | <b>2.36 (1.83, 3.04)</b>                                      | <b>0.44 (0.35, 0.54)</b>                                                    |
| ICU after presentation                             | <b>2.02 (1.51, 2.71)</b> | <b>2.14 (1.60, 2.86)</b>                                      |                                                                             |
| Steroid use, N (%)                                 |                          |                                                               |                                                                             |
| No                                                 | Ref                      | Ref                                                           | Ref                                                                         |
| Yes                                                | 1.00 (0.83, 1.20)        | <b>1.49 (1.22, 1.83)</b>                                      | <b>0.37 (0.29, 0.47)</b>                                                    |
| Remdesivir use, N (%)                              |                          |                                                               |                                                                             |
| No                                                 | Ref                      | Ref                                                           | Ref                                                                         |
| Yes                                                | <b>0.76 (0.58, 0.98)</b> | <b>1.69 (1.20, 2.37)</b>                                      | <b>0.34 (0.26, 0.45)</b>                                                    |
| Hospital admission volume divided by 50 (per week) | <b>1.10 (1.08, 1.12)</b> | <b>1.08 (1.05, 1.11)</b>                                      | <b>0.72 (0.53, 0.97)</b>                                                    |

497

498 Table S3: Cox proportional hazards model of the association between steroid use and 30-day  
 499 mortality stratified to examine confounding by disease severity.

| Stratifying variable | Treatment Variable      | Dead N | Alive N | HR (95% CI)              |
|----------------------|-------------------------|--------|---------|--------------------------|
|                      | Steroid <sup>+</sup>    | 338    | 1384    | 1.15 (1.00, 1.33)        |
|                      | No Steroid              | 405    | 2052    |                          |
| Age < 75 years       | Steroid <sup>+</sup>    | 149    | 1034    | 1.47 (1.17, 1.85)        |
|                      | No Steroid              | 139    | 1491    |                          |
| Age ≥ 75 years       | Steroid <sup>+</sup>    | 189    | 350     | 1.00 (0.92, 1.20)        |
|                      | No Steroid              | 266    | 561     |                          |
| Wave 1               | Steroid <sup>+</sup>    | 185    | 527     | <b>1.34 (1.12, 1.59)</b> |
|                      | No Steroid              | 390    | 1668    |                          |
| Wave 2               | Steroid <sup>+</sup>    | 153    | 857     | <b>4.2 (2.51, 7.26)</b>  |
|                      | No Steroid              | 15     | 384     |                          |
| Wave 1, ICU          | Steroid <sup>+</sup>    | 94     | 202     | <b>0.53 (0.41, 0.70)</b> |
|                      | No Steroid              | 130    | 144     |                          |
| Wave 1, Non-ICU      | Steroid <sup>+</sup>    | 91     | 325     | 2.22 (0.97, 5.09)        |
|                      | No Steroid              | 260    | 1524    |                          |
| Wave 2, ICU          | Steroid <sup>+</sup>    | 79     | 107     | <b>1.48 (1.17, 1.88)</b> |
|                      | No Steroid              | 6      | 22      |                          |
| Wave 2, Non-ICU      | Steroid <sup>+</sup>    | 74     | 750     | <b>3.83 (1.92, 7.64)</b> |
|                      | No Steroid              | 9      | 362     |                          |
|                      | Remdesivir <sup>+</sup> | 108    | 575     | <b>0.81 (0.66, 0.99)</b> |
|                      | No Remdesivir           | 660    | 2922    |                          |
| Age < 75 years       | Remdesivir <sup>+</sup> | 42     | 420     | 0.85 (0.62, 1.17)        |
|                      | No Remdesivir           | 251    | 2157    |                          |
| Age ≥ 75 years       | Remdesivir <sup>+</sup> | 66     | 155     | <b>0.76 (0.58, 0.98)</b> |
|                      | No Remdesivir           | 409    | 765     |                          |
| Wave 1               | Remdesivir <sup>+</sup> | 8      | 74      | <b>0.42 (0.21, 0.84)</b> |
|                      | No Remdesivir           | 592    | 2172    |                          |
| Wave 2               | Remdesivir <sup>+</sup> | 100    | 501     | <b>2.06 (1.51, 2.80)</b> |
|                      | No Remdesivir           | 68     | 750     |                          |
| Wave 1, ICU          | Remdesivir <sup>+</sup> | 6      | 34      | <b>0.30 (0.13, 0.67)</b> |
|                      | No Remdesivir           | 225    | 319     |                          |
| Wave 1, Non-ICU      | Remdesivir <sup>+</sup> | 2      | 40      | 0.27 (0.07, 1.07)        |
|                      | No Remdesivir           | 367    | 1853    |                          |
| Wave 2, ICU          | Remdesivir <sup>+</sup> | 45     | 68      | 0.95 (0.62, 1.45)        |
|                      | No Remdesivir           | 40     | 61      |                          |
| Wave 2, Non-ICU      | Remdesivir <sup>+</sup> | 55     | 433     | <b>2.96 (1.88, 4.67)</b> |
|                      | No Remdesivir           | 28     | 689     |                          |

500

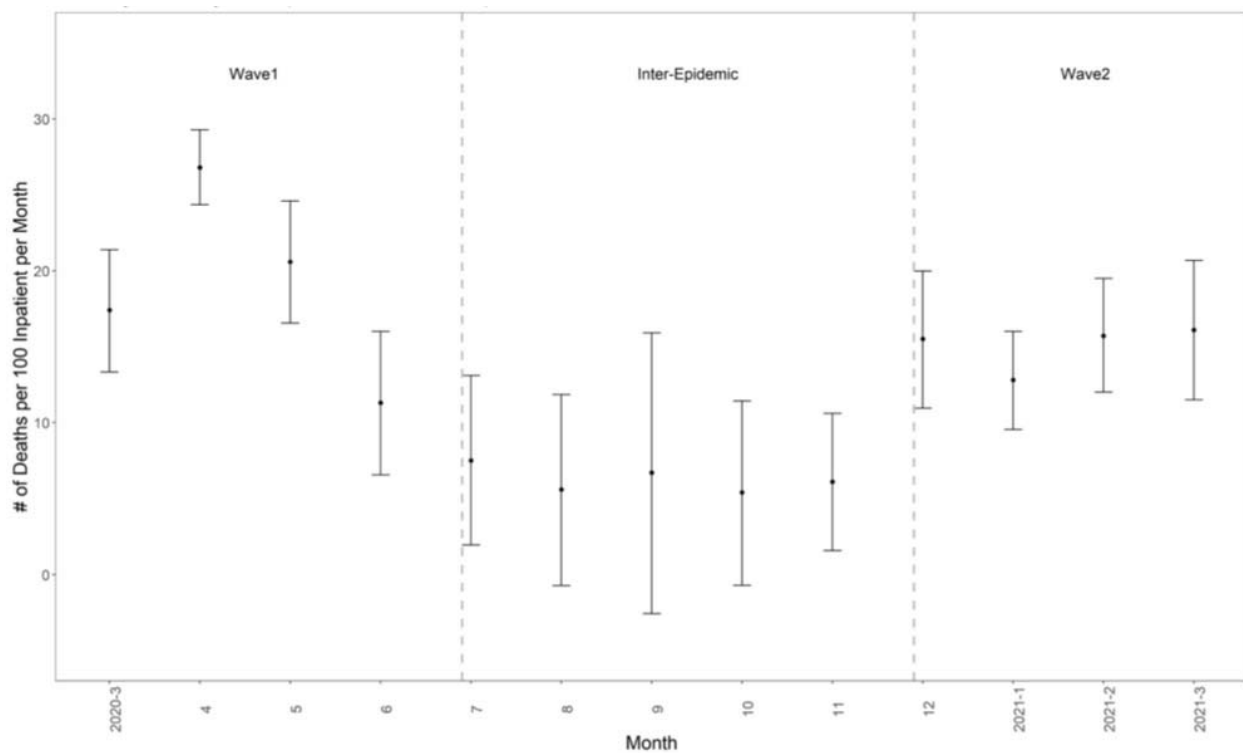

501

| Month          | 2020-3 | 4    | 5   | 6   | 7  | 8  | 9  | 10 | 11  | 12  | 2021-1 | 2021-2 | 2021-3 |
|----------------|--------|------|-----|-----|----|----|----|----|-----|-----|--------|--------|--------|
| Deaths (N)     | 71     | 458  | 100 | 22  | 7  | 3  | 2  | 3  | 7   | 45  | 60     | 68     | 47     |
| Admissions (N) | 409    | 1708 | 486 | 195 | 93 | 54 | 30 | 56 | 115 | 291 | 470    | 432    | 292    |

502

503 Figure S1. In-hospital monthly mortality rates per 100 patients and 95% confidence bounds

504 among 4132 patients admitted to the medical center between March 2020 and March 2021.
